# Supplementary material for: Unraveling the Impact of Extracellular Vesicle-Depleted Serum on Endothelial Cell Characteristics over Time
Source: MDPI journal article supplement (doi:10.3390/ijms25094761), 2024-04-27
Supplement: s1 [file s1]

**Title:** *Unraveling the impact of extracellular vesicle-depleted serum on endothelial cell characteristics over time*

**Authors:** Luiz Fernando Cardoso Garcia<sup>1</sup>; Pryscilla Fanini Wowk<sup>2</sup>, Letusa Albrecht<sup>1,\*</sup>

**Affiliation:** 1: Laboratório de Pesquisa em Apicomplexa, ICC-Fiocruz-PR. 2: Grupo de Pesquisa em Imunologia Celular, ICC-Fiocruz-PR.

\*: corresponding author.

## SUPPLEMENTARY DATA AND SUBTITLES

| Unique proteins in Sup2h | Common between EV2h and Sup2h | Unique proteins in Sup24h | Common between EV24h and Sup24h |
|--------------------------|-------------------------------|---------------------------|---------------------------------|
| GRHPR                    | RPL4                          | TAF15                     | FASN                            |
| TXNRD1                   | RPL3                          | SET                       | CCT5                            |
| NACA                     | RPS8                          | SPTAN1                    | IPO7                            |
| RPS5                     | RPS3A                         | PROS1                     | S100A6                          |
| LAP3                     | CLTC                          | HIST1H2AC                 | THBS1                           |
| RPS25                    | EEF1A1                        | ASAH1                     | XRCC6                           |
|                          | HSPA1B                        | DSC2                      | AKR1B1                          |
|                          | ENO1                          | CTSV                      | TNC                             |
|                          | EEF1A2                        | NUDT5                     | TARS                            |
|                          | GPI                           | NPC2                      | PRDX6                           |
|                          | LDHB                          | NRP1                      | ATIC                            |
|                          | HSPD1                         | PTPRK                     | ACLY                            |
|                          | ACTN1                         | B4GAT1                    | TINAGL1                         |
|                          | P4HB                          | ATRN                      | CLTC                            |
|                          | VCP                           | PRSS23                    | EEF1A1                          |
|                          | HSP90B1                       | HPRT1                     | HSPA1B                          |
|                          | SLC3A2                        | CBS                       | ENO1                            |
|                          | PPIB                          | TXN                       | EEF1A2                          |
|                          | FLNB                          | TIMP2                     | GPI                             |
|                          | PDIA3                         | CBR1                      | LDHB                            |
|                          | MYH9                          | GLB1                      | HSPD1                           |
|                          | ACTN4                         | PAM                       | ACTN1                           |
|                          | UBC                           | WARS                      | P4HB                            |
|                          | HNRNPC                        | SFN                       | VCP                             |
|                          | RAN                           | GPC1                      | HSP90B1                         |
|                          | MYL6                          | BTB                       | SLC3A2                          |
|                          | RPLP0                         | LAMB2                     | PPIB                            |
|                          | ARPC4-TTL3                    | NEO1                      | FLNB                            |

---

|          |         |             |
|----------|---------|-------------|
| CD44     | GDF15   | PDIA3       |
| EIF5A    | ROBO1   | MYH9        |
| ALDOA    | RNASET2 | ACTN4       |
| CLIC1    | CTSH    | UBC         |
| ADAM10   | LFNG    | HNRNPC      |
| LDHA     | LIPA    | RAN         |
| PGK1     | ARSA    | MYL6        |
| FN1      | GBA     | RPLP0       |
| GAPDH    | CLN5    | ARPC4-TTLL3 |
| ANXA2    | PPT1    | CD44        |
| TUBB     | MANBA   | EIF5A       |
| PFN1     | C1R     | ALDOA       |
| HSP90AA1 | GLA     | CLIC1       |
| HSP90AB1 | SDF4    | ADAM10      |
| VIM      | CTSF    | LDHA        |
| LGALS1   | ATP6AP1 | PGK1        |
| HSPA5    | CTSL    | FN1         |
| HSPA8    | AGT     | GAPDH       |
| EEF2     | TCN2    | ANXA2       |
| PKM      | HAVCR1  | TUBB        |
| EZR      | MAN2B2  | PFN1        |
| NME1     | CTSB    | HSP90AA1    |
| TCP1     | NUCB2   | HSP90AB1    |
| VCL      | FTH1    | VIM         |
| PGAM1    | PLA2G15 | LGALS1      |
| FLNA     | TWSG1   | HSPA5       |
| UBA1     | DNASE2  | HSPA8       |
| AHCY     | LAMA5   | EEF2        |
| MSN      | FSTL3   | PKM         |
| TKT      | FUCA1   | EZR         |
| YWHAB    | GUSB    | NME1        |
| COL18A1  | GAA     | TCP1        |
| MDH2     | COL6A2  | VCL         |
| IQGAP1   | BMP1    | PGAM1       |
| GDI2     | NID1    | FLNA        |
| CCT8     | NAGA    | UBA1        |
| CCT4     | GM2A    | AHCY        |
| TPI1     | EFNA1   | MSN         |
| ACTB     | PTPRG   | TKT         |
| EIF4A1   | HSPA13  | YWHAB       |
| HNRNPK   | SGSH    | COL18A1     |
| YWHAE    | SIRPA   | MDH2        |
| RPS4X    | JAG1    | IQGAP1      |
| HIST1H4A | SRPX    | GDI2        |
| PPIA     | CTBS    | CCT8        |
| YWHAZ    | GALNT2  | CCT4        |

---

---

|        |         |           |
|--------|---------|-----------|
| ACTA1  | PTPRS   | TPI1      |
| TUBA1B | GAS6    | ACTB      |
| TUBB4B | WFDC2   | EIF4A1    |
| CCT2   | MBTPS1  | HNRNPK    |
| YWHAH  | EXT1    | YWHAE     |
| PRDX1  | MAN2A1  | RPS4X     |
| DHX9   | QPCT    | HIST1H4A  |
| KPNB1  | MEGF8   | PPIA      |
| FSCN1  | GALNT7  | YWHAZ     |
| PADI2  | CANT1   | ACTA1     |
| TLN1   | PVRL2   | TUBA1B    |
| CTSD   | PTPRU   | TUBB4B    |
| LMNA   | EXT2    | CCT2      |
| NPEPPS | NEU1    | YWHAH     |
| NCL    | SORT1   | PRDX1     |
| RPS2   | OSMR    | DHX9      |
| RPS16  | CHID1   | KPNB1     |
| GOT2   | XYLT2   | FSCN1     |
| PDIA4  | SIAE    | PADI2     |
| RPS3   | DPP7    | TLN1      |
| EEF1G  | MINPP1  | CD9       |
| CCT6A  | PLS3    | ITGB1     |
| B2M    | SNRPN   | HIST1H2BN |
| YWHAG  | PEBP1   | ICAM1     |
| CRYZ   | PGM1    | NPNT      |
| GANAB  | HDGF    | SDCBP     |
|        | KARS    | SERPINE2  |
|        | PLEC    | S100A11   |
|        | UGP2    | SEMA3C    |
|        | VEGFA   |           |
|        | SGCE    |           |
|        | PCOLCE2 |           |
|        | TGFB1   |           |
|        | FAM49B  |           |
|        | EIF4A2  |           |
|        | MAN1B1  |           |
|        | TOR1B   |           |
|        | B4GALT5 |           |
|        | IDS     |           |
|        | EFNB3   |           |
|        | PLD3    |           |
|        | HTRA1   |           |
|        | CCT7    |           |
|        | GNPTG   |           |

---

**Supplementary table S1.** Proteins unique to Sup2h and Sup24h and in common with EV2h and EV24h. EVs were obtained by ultracentrifugation from HBMEC grown in

DMEM supplemented with EVdS for 2 or 24 hours. After isolation of EVs, supernatant proteins were precipitated with ammonium sulfate and both EV and supernatant proteins were resolved on a polyacrylamide gel and analyzed using LC-MS/MS. The reference proteome for *Homo sapiens* was acquired from the UniProt database. Distribution of unique or common proteins between EVs and supernatant depleted from EVs at 2h (Sup2h) or 24h (Sup24h) was expressed in a spreadsheet, with 7 unique proteins found in Sup2h, 101 common between Sup2h and EV2h, 119 unique proteins found in Sup24h and 104 common between Sup24h and EV24h. The data was obtained from three biological replicates.

| Abbreviation | Definition                                                 |
|--------------|------------------------------------------------------------|
| EV           | Extracellular Vesicle                                      |
| Ab-ICAM-1    | Antibody anti ICAM-1                                       |
| ACTG1        | Actin Gamma-1                                              |
| ANOVA        | Analysis of Variance                                       |
| ANX5         | Annexin-V                                                  |
| ANXA1        | Annexin A1                                                 |
| ANXA5        | Annexin A5                                                 |
| ARF6         | ADP-ribosylation factor 6                                  |
| ATP5B        | ATP synthase F1 subunit beta                               |
| BCL2         | B-cell lymphoma 2                                          |
| CD63         | Cluster of Differentiation 63                              |
| CHO          | Chinese Hamster Ovary                                      |
| CLTC         | Clathrin heavy chain 1                                     |
| COL18A1      | Collagen Type XVIII Alpha 1 Chain                          |
| DAPI         | 4',6-diamidino-2-phenylindole                              |
| DARC         | Duffy antigen receptor for chemokine                       |
| DTT          | Dithiothreitol                                             |
| EDTA         | ethylenediaminetetraacetic acid                            |
| ER           | Endoplasmatic Reticulum                                    |
| ERM          | Ezrin, Radixin and Moesin                                  |
| ESYT1        | extended synaptotagmin-1                                   |
| EV24h        | Extracellular vesicles isolated from a 24-hour cultivation |
| EV2h         | Extracellular vesicles isolated from a 2-hour cultivation  |
| EVdS         | Extracellular Vesicle depleted Serum                       |
| FBS          | Fetal Bovine Serum                                         |
| FDR          | Forward Scatter                                            |
| FEA          | Functional Enrichment Analysis                             |
| FN1          | Fibronectin-1                                              |
| HBMEC        | Human Brain Microvascular Endothelial Cell                 |
| HIV-1        | Human Immunodeficiency Virus 1                             |
| HSP70        | Heatshock Protein 70                                       |
| HSPD1        | Heat Shock Protein Family D Member 1                       |
| ICAM-1       | Intercellular Adhesion Molecule-1                          |
| IL-6         | Interleukin-6                                              |

---

|          |                                                           |
|----------|-----------------------------------------------------------|
| IL-8     | Interleukin-8                                             |
| ITGB1    | Integrin Beta 1                                           |
| KEGG     | Kyoto Encyclopedia of Genes and Genomes                   |
| LC-MS/MS | Liquid Chromatography Tandem Mass Spectrometry            |
| IEV      | large Extracellular Vesicle                               |
| LFQ      | Label-Free Quantification                                 |
| MFGE8    | Milk fat globule-EGF factor 8                             |
| MFI      | Mean Fluorescence Intensity                               |
| MISEV    | Minimal Information for Studies of Extracellular Vesicles |
| mTORC1   | mechanistic target of rapamycin Complex 1                 |
| NF-κB    | Nuclear Factor Kappa B                                    |
| NTA      | Nanoparticle Tracking Analysis                            |
| ORA      | overrepresentation analysis                               |
| P4HB     | prolyl 4-hydroxylase                                      |
| PCA      | Principal Component Analysis                              |
| PDCD6IP  | Programmed cell death 6-interacting protein               |
| PDIA3    | Protein disulfide isomerase A3                            |
| PI       | propidium iodide                                          |
| PI3K     | Phosphoinositide 3-kinase                                 |
| qPCR     | quantitative PCR                                          |
| RAP1     | Ras-related protein 1                                     |
| RPL4     | Ribosomal Protein L4                                      |
| RPL6     | Ribosomal Protein L6                                      |
| RPMI     | Roswell Park Memorial Institute                           |
| SDCBP    | Syndecan Binding Protein                                  |
| sEV      | small Extracellular Vesicle                               |
| SOCS3    | Suppressor of Cytokine Signaling 3                        |
| SSC      | Side Scatter                                              |
| Sup24h   | Supernatant from a 24-hour cultivation                    |
| Sup2h    | Supernatant from a 2-hour cultivation                     |
| T150     | 150 cm <sup>2</sup>                                       |
| T25      | 25 cm <sup>2</sup>                                        |
| T75      | 75 cm <sup>2</sup>                                        |
| TEM      | Transmission Electron Microscopy                          |
| TGF-B    | Tissue Growth Factor B                                    |
| TGM2     | Transglutaminase 2                                        |
| THP-1    | human acute monocytic leukemia cell line-1                |
| THP-1    | Human Acute Monocytic Leukemia Cell Line                  |
| TNF      | Tumor Necrosis Factor                                     |
| TNFr     | TNF receptor                                              |
| TUBA1    | Tubulin A1                                                |
| TUFM     | Mitochondrial Tu translation elongation factor            |
| VEGF     | Vascular Endothelial Growth Factor                        |
| V-SSC    | Violet Side Scatter                                       |

---

**Supplementary table S2.** List of abbreviations.

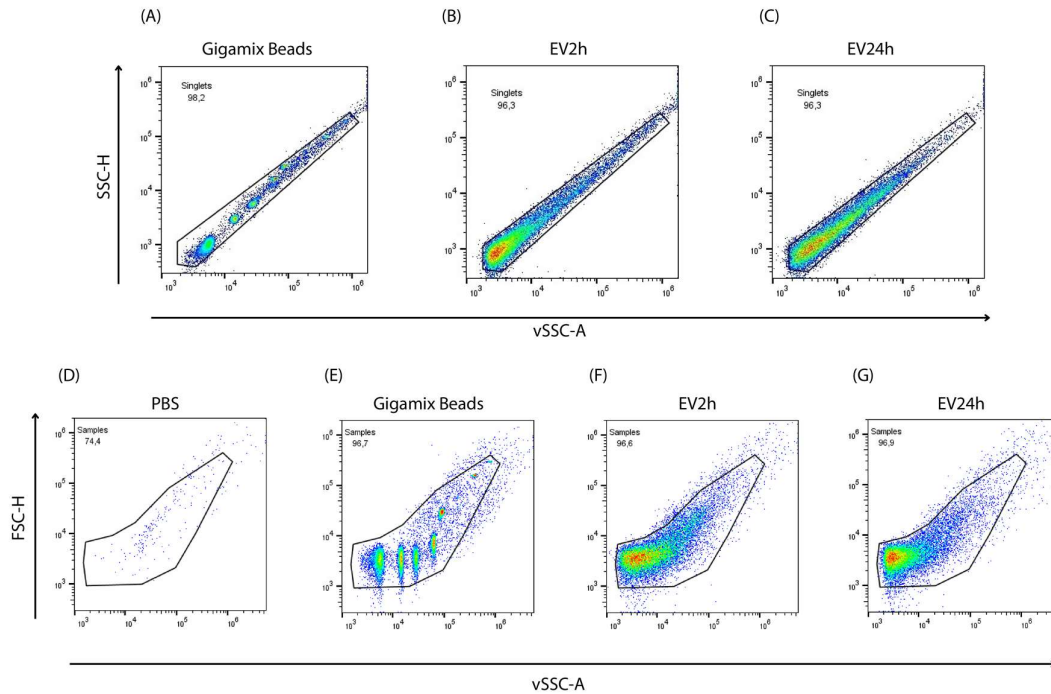

**Supplementary figure S1.** Gating strategy for identifying EVs by flow cytometry. EVs were obtained by differential centrifugation of the supernatant of HBMECs grown in DMEM with EVdS for 2 and 24 hours. After that, they were evaluated by flow cytometry. Initially, Gigamix Bead (Megamix-Plus SSC beads and Megamix-Plus FSC beads) (A), EV2h (B) and EV24h (C) singlets were identified and selected by the relationship between height (SSC-H) and area (vSSC-A) measured from the lateral light scattering. The second gate was developed taking as reference the relationship between forward (FSC-H) and side (vSSC-A) light scattering of the Gigamix Bead (D-G). Graphs constructed from a representative replicate of three biological replicates.

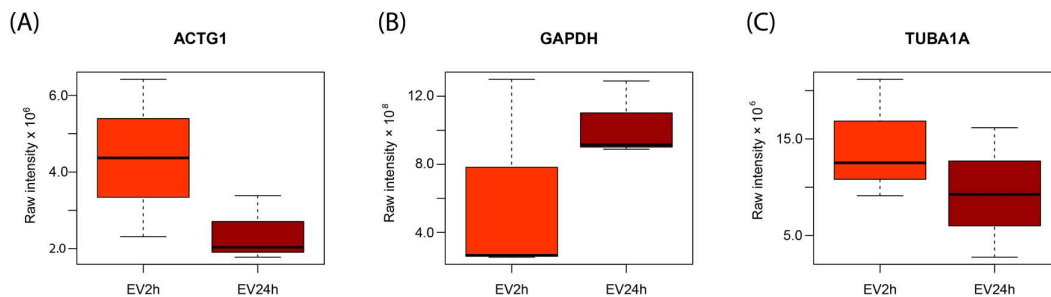

**Supplementary figure S2.** Evaluation of proteins with constitutive expression in EV2h and EV24h. Extracellular vesicles obtained by ultracentrifugation from HBMEC grown in DMEM supplemented with EVdS for 2 or 24 hours. Total EV protein extract resolved on polyacrylamide gel and analyzed on LC-MS/MS. Reference proteome for *Homo sapiens* acquired from the UniProt database. ACTG1 (A), GAPDH (B) and TUBA1A (C) were graphed based on their raw intensity. The data was obtained from three biological replicates.

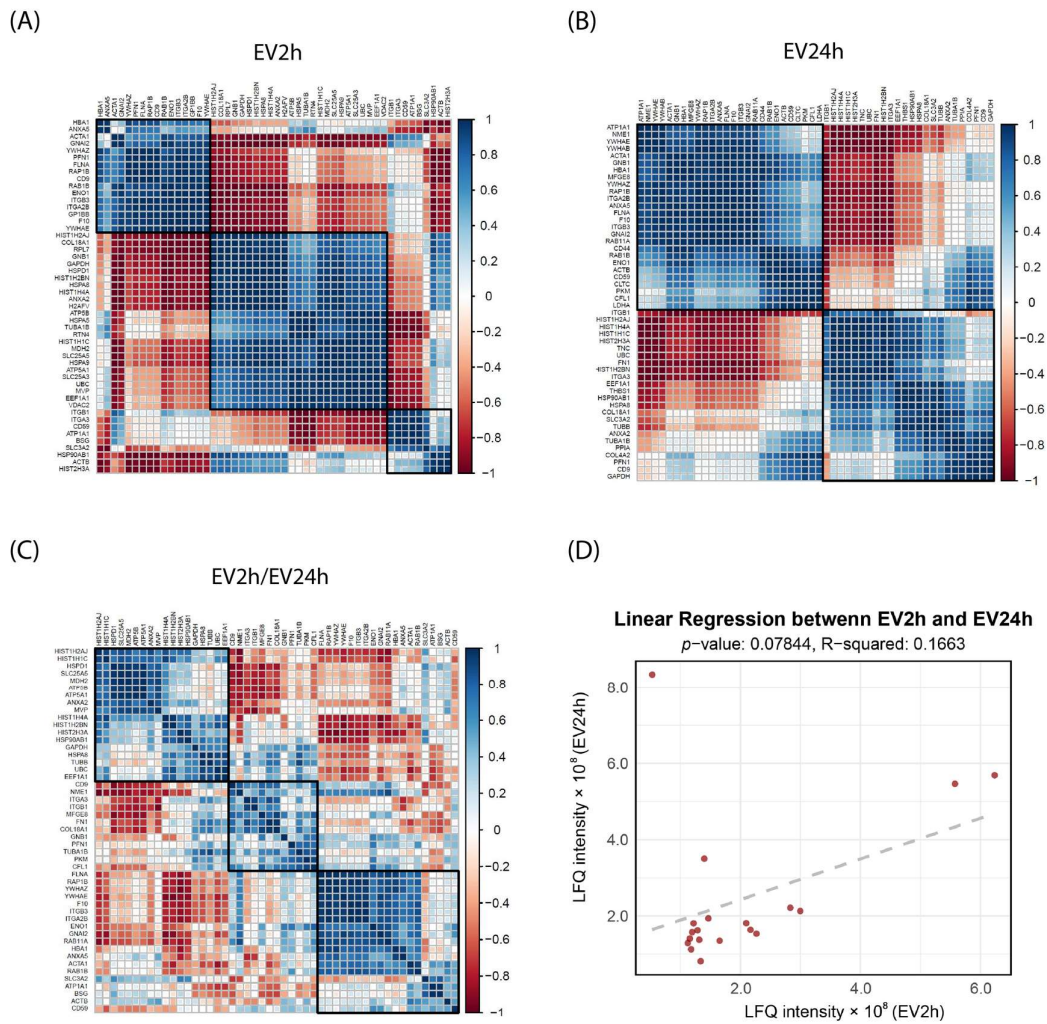

**Supplementary figure S3.** EV2h and EV24h exhibit distinct protein content. Extracellular vesicles were obtained by ultracentrifugation from HBMEC cells cultured in DMEM supplemented with EVdS for 2 or 24 hours. The total protein extract from EVs was resolved on a polyacrylamide gel and analyzed using LC-MS/MS. The reference proteome for *Homo sapiens* was acquired from the UniProt database. Top 50 proteins ranked based on LFQ intensity from EV2h (A), EV24h (B), and common proteins between EV2h and EV24h (C) were represented in correlation matrices. Graphs were organized using hierarchical clustering. 50 common proteins ranked according to LFQ intensity were plotted on a linear regression curve (D). Data were obtained from three biological replicates. 95% confidence interval.

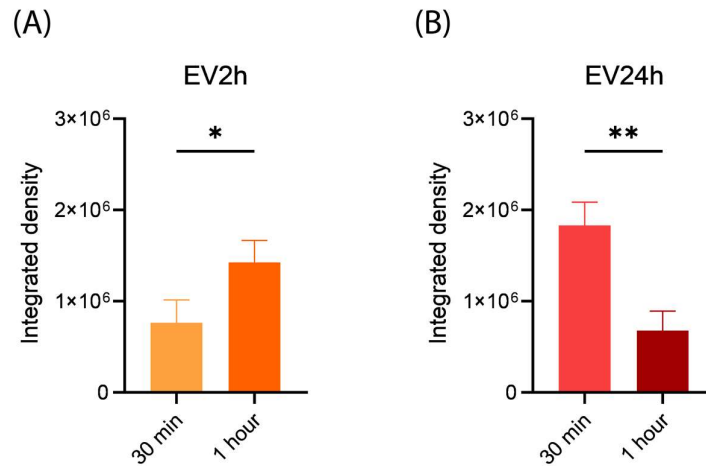

**Supplementary Figure S4.** EV2h and EV24h Uptake rate at 30 minutes and 1 hour. EVs were obtained from HBMEC previously labeled with CFSE and cultured in DMEM supplemented with EVdS. The isolation of EVs was performed by differential centrifugation. HBMEC were cultured in 24-well plates and incubated with EV2h (A) or EV24h (B) at a concentration of 100 ng/mL for 30 minutes or 1 hour. Subsequently, the cells were washed, fixed with 4% paraformaldehyde, stained with DAPI, and examined under a fluorescence microscope. The acquired images were analyzed using specific software, and the results were expressed as integrated density. The data were obtained from three biological replicates with five technical replicates each and are presented as mean  $\pm$  standard deviation (t-test). \*:  $p$ -value  $< 0.05$ ; \*\*:  $p$ -value  $< 0.01$ .

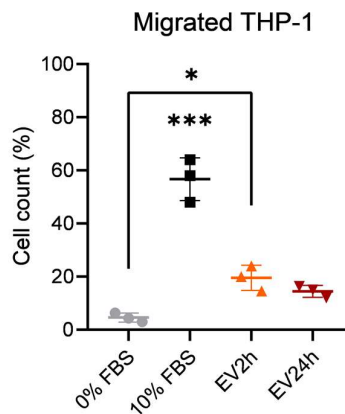

**Supplementary Figure S5.** EV2h exhibits chemotactic properties for THP1 cells. EVs were obtained from HBMEC cultured in RPMI supplemented with EVdS. Isolation of EVs was performed by differential centrifugation. Approximately  $4.4 \times 10^4$  THP-1 cells were maintained in RPMI without FBS in the upper chamber of transwell plates with 8  $\mu$ m polycarbonate filters. RPMI medium without FBS (0% FBS) or supplemented with 10% FBS, EV2h, or EV24h (100 ng/mL) was added to the lower chamber. After 16 hours of incubation, cells in the lower chamber were counted. Data were obtained from three biological replicates, three technical replicates, and expressed as mean  $\pm$  standard deviation (ANOVA/Tukey); \*:  $p$ -value  $< 0.05$ ; \*\*\*:  $p$ -value  $< 0.001$ .





in Sup24h. The significance of each term was demonstrated as  $-\log_{10}(\text{FDR})$ . Data obtained from three biological replicates.

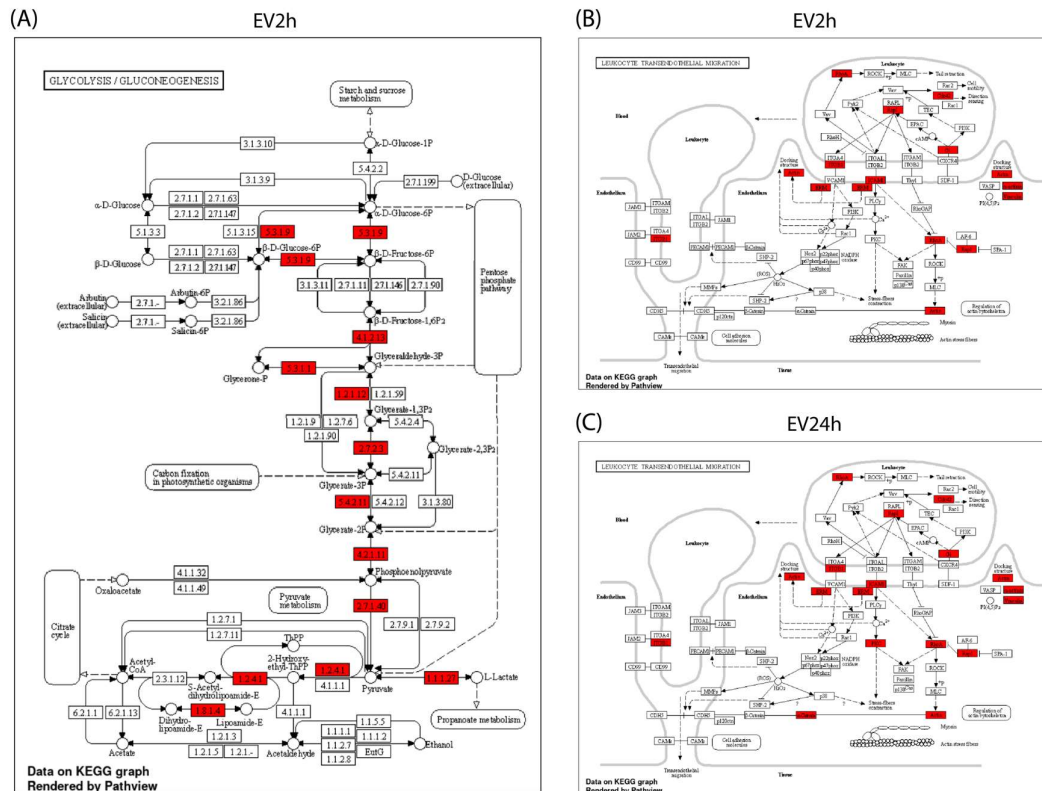

**Supplementary figure S7.** Molecular interaction network in the energy metabolism of EV2h proteins. EVs were obtained from HBMEC cultured in DMEM supplemented with EVdS for 2 or 24 hours using ultracentrifugation. Total protein extracts from the EVs were separated on a polyacrylamide gel and subsequently analyzed using LC-MS/MS. A reference proteome for *Homo sapiens* was acquired from the UniProt database. Molecular interaction networks for glycolysis/gluconeogenesis (A) and leukocyte transendothelial migration (B and C) were conducted using the ShinyGo and Pathview platforms. Proteins found in EV2h (A and B) and EV24h (C) are represented by red squares in the molecular interaction network. Data obtained from three biological replicates.

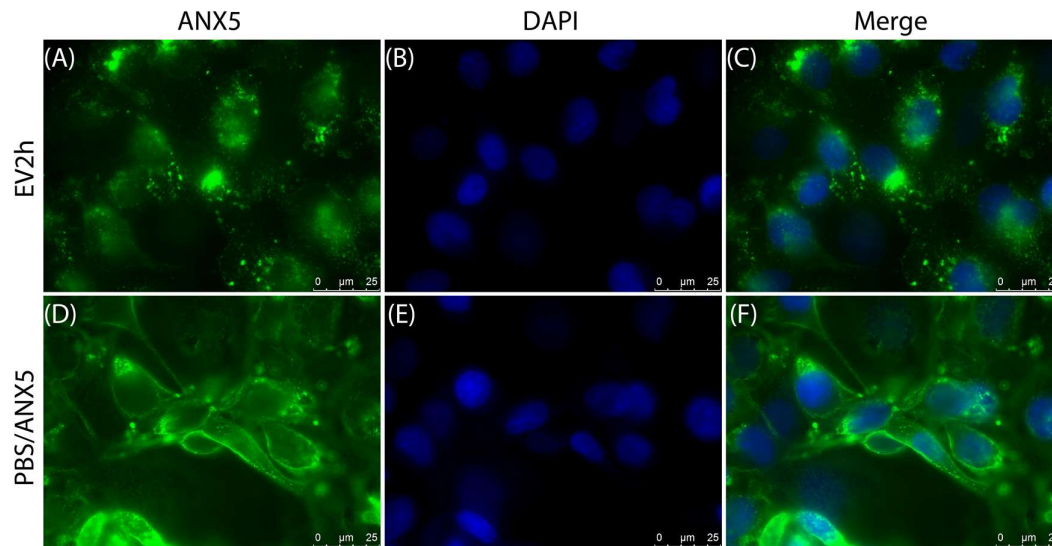

**Supplementary figure S8.** Evaluation of the uptake rate of EV2h labeled with ANX5. EVs were obtained from HBMEC cultured for 2 hours in DMEM supplemented with EVdS. The isolation of EV2h was performed by differential centrifugation. Subsequently, EV2h was labeled with Annexin-V conjugated to phycoerythrin (green), washed with sterile PBS, and centrifuged at  $100,000\times g$  (A-C). As a negative control, EV free Annexin-V stained PBS (PBS/ANX5) (D-F) was used. HBMEC were grown in 24-well plates and incubated with EV2h or PBS/ANX5 for 30 minutes. After, the cells were washed, fixed with 4% paraformaldehyde, stained with DAPI (blue), and then evaluated under a fluorescence microscope. Representative images of three biological replicates.
